# Supplementary material
Source: publisher site journal article supplement (https://www.dovepress.com/article/451066)
Supplement: Supplementary file 1 [file get_supplementary_file.php]

Supplementary Table 1. Primer sequences for RT-PCR.

| Primer | Sequence (5’→3’) |
| --- | --- |
| GAPDH-F | CCATCAATGACCCCTTCATTGACC |
| GAPDH-R | GAAGGCCATGCCAGTGAGCTTCC |
| GRSF1-F | GCCAGCGGTATGTGGAAGTAT |
| GRSF1-R | AGGCGAAGATTTGACCTGCAA |
